# Supplementary material for: The rs3957357C>T SNP in GSTA1 Is Associated with a Higher Risk of Occurrence of Hepatocellular Carcinoma in European Individuals
Source: PLoS One. 2016 Dec 9;11(12):e0167543. doi: 10.1371/journal.pone.0167543 (PMC5147914; doi:10.1371/journal.pone.0167543)
Supplement: S2 Table — Gene ontology enrichment analysis was performed with FuncAssociate 2.0 [40] using hgnc_symbol as namespace and p<0.05 as significance cutoff. LOD is the log10 of the odds value indicating over- or under-representation. (XLSX) [file pone.0167543.s002.xlsx]

## Sheet: Supplementary Table 2
Ontology of genes positively correlated with GSTA1 (Pearson's correlation coefficient > 0.4) in 247 human HCCs
LOD	Adjusted P	Attribute ID	Over represented GO terms
2.79862	<0.001	GO:0051919	positive regulation of fibrinolysis
2.68778	0.013	GO:0006565	L-serine catabolic process
2.68778	0.013	GO:0009093	cysteine catabolic process
2.68778	0.013	GO:0009822	alkaloid catabolic process
2.68778	0.013	GO:0019448	L-cysteine catabolic process
2.68778	0.013	GO:0046271	phenylpropanoid catabolic process
2.68778	0.013	GO:0046439	L-cysteine metabolic process
2.32148	<0.001	GO:0006572	tyrosine catabolic process
2.21064	0.038	GO:0009092	homoserine metabolic process
2.21064	0.038	GO:0010915	regulation of very-low-density lipoprotein particle clearance
2.21064	0.038	GO:0010916	negative regulation of very-low-density lipoprotein particle clearance
2.21064	0.038	GO:0019346	transsulfuration
2.21064	0.038	GO:0019482	beta-alanine metabolic process
2.21064	0.038	GO:0032489	regulation of Cdc42 protein signal transduction
2.21064	0.038	GO:0034363	intermediate-density lipoprotein particle
2.18846	<0.001	GO:0009698	phenylpropanoid metabolic process
2.0996	<0.001	GO:0009804	coumarin metabolic process
2.0996	<0.001	GO:0034382	chylomicron remnant clearance
2.0996	<0.001	GO:0071830	triglyceride-rich lipoprotein particle clearance
2.04231	<0.001	GO:0034366	spherical high-density lipoprotein particle
2.0074	<0.001	GO:0009071	serine family amino acid catabolic process
1.96759	<0.001	GO:0042737	drug catabolic process
1.93314	<0.001	GO:0006534	cysteine metabolic process
1.92022	<0.001	GO:0006559	L-phenylalanine catabolic process
1.92022	<0.001	GO:1902222	erythrose 4-phosphate/phosphoenolpyruvate family amino acid catabolic process
1.91151	<0.001	GO:0051917	regulation of fibrinolysis
1.84765	<0.001	GO:0006558	L-phenylalanine metabolic process
1.84765	<0.001	GO:1902221	erythrose 4-phosphate/phosphoenolpyruvate family amino acid metabolic process
1.84596	<0.001	GO:0006570	tyrosine metabolic process
1.84428	0.008	GO:0046951	ketone body biosynthetic process
1.81493	<0.001	GO:0006699	bile acid biosynthetic process
1.77339	<0.001	GO:0000098	sulfur amino acid catabolic process
1.77339	<0.001	GO:0033700	phospholipid efflux
1.77339	<0.001	GO:0042738	exogenous drug catabolic process
1.77339	<0.001	GO:0050667	homocysteine metabolic process
1.75711	0.015	GO:0051918	negative regulation of fibrinolysis
1.73109	<0.001	GO:0071941	nitrogen cycle metabolic process
1.71122	<0.001	GO:0006069	ethanol oxidation
1.71122	<0.001	GO:0019627	urea metabolic process
1.71122	<0.001	GO:0032372	negative regulation of sterol transport
1.71122	<0.001	GO:0032375	negative regulation of cholesterol transport
1.71122	<0.001	GO:0042627	chylomicron
1.68519	<0.001	GO:0034364	high-density lipoprotein particle
1.68453	0.022	GO:0031639	plasminogen activation
1.68453	0.022	GO:0046950	cellular ketone body metabolic process
1.66361	<0.001	GO:0000097	sulfur amino acid biosynthetic process
1.65683	0.002	GO:0006000	fructose metabolic process
1.62236	0.042	GO:0000050	urea cycle
1.62236	0.042	GO:0009820	alkaloid metabolic process
1.62236	0.042	GO:0015238	drug transmembrane transporter activity
1.62236	0.042	GO:0019373	epoxygenase P450 pathway
1.62236	0.042	GO:0033540	fatty acid beta-oxidation using acyl-CoA oxidase
1.62236	0.042	GO:1902224	ketone body metabolic process
1.61866	<0.001	GO:0005782	peroxisomal matrix
1.61866	<0.001	GO:0031907	microbody lumen
1.6085	0.003	GO:0006067	ethanol metabolic process
1.6085	0.003	GO:0009070	serine family amino acid biosynthetic process
1.6085	0.003	GO:0051004	regulation of lipoprotein lipase activity
1.60239	<0.001	GO:0017144	drug metabolic process
1.59392	<0.001	GO:0034361	very-low-density lipoprotein particle
1.59392	<0.001	GO:0034385	triglyceride-rich lipoprotein particle
1.56501	0.006	GO:0006577	amino-acid betaine metabolic process
1.56351	<0.001	GO:0007597	blood coagulation, intrinsic pathway
1.56286	<0.001	GO:0009074	aromatic amino acid family catabolic process
1.5503	<0.001	GO:0000096	sulfur amino acid metabolic process
1.54294	<0.001	GO:0009069	serine family amino acid metabolic process
1.52548	0.006	GO:0006555	methionine metabolic process
1.52548	0.006	GO:0055102	lipase inhibitor activity
1.51976	<0.001	GO:0008206	bile acid metabolic process
1.499	<0.001	GO:0042730	fibrinolysis
1.49326	<0.001	GO:0034358	plasma lipoprotein particle
1.49326	<0.001	GO:1990777	lipoprotein particle
1.49078	<0.001	GO:0072329	monocarboxylic acid catabolic process
1.49016	<0.001	GO:0016712	oxidoreductase activity, acting on paired donors, with incorporation or reduction of molecular oxygen, reduced flavin or flavoprotein as one donor, and incorporation of one atom of oxygen
1.48924	0.013	GO:0034377	plasma lipoprotein particle assembly
1.48112	<0.001	GO:0006063	uronic acid metabolic process
1.48112	<0.001	GO:0019585	glucuronate metabolic process
1.47001	<0.001	GO:0006706	steroid catabolic process
1.46162	<0.001	GO:0032994	protein-lipid complex
1.4558	0.014	GO:0016878	acid-thiol ligase activity
1.44978	<0.001	GO:0016054	organic acid catabolic process
1.44978	<0.001	GO:0046395	carboxylic acid catabolic process
1.42474	0.018	GO:0034381	plasma lipoprotein particle clearance
1.42474	0.018	GO:0046653	tetrahydrofolate metabolic process
1.41726	0.002	GO:0033344	cholesterol efflux
1.41233	<0.001	GO:0015721	bile acid and bile salt transport
1.40534	<0.001	GO:1901606	alpha-amino acid catabolic process
1.39585	<0.001	GO:0009062	fatty acid catabolic process
1.39575	0.02	GO:0065005	protein-lipid complex assembly
1.3931	0.002	GO:0070330	aromatase activity
1.38055	<0.001	GO:0009063	cellular amino acid catabolic process
1.37683	<0.001	GO:0034308	primary alcohol metabolic process
1.36872	<0.001	GO:0006635	fatty acid beta-oxidation
1.36016	<0.001	GO:0030170	pyridoxal phosphate binding
1.35677	<0.001	GO:0016709	oxidoreductase activity, acting on paired donors, with incorporation or reduction of molecular oxygen, NAD(P)H as one donor, and incorporation of one atom of oxygen
1.35294	<0.001	GO:0009072	aromatic amino acid family metabolic process
1.34847	0.006	GO:0016620	oxidoreductase activity, acting on the aldehyde or oxo group of donors, NAD or NADP as acceptor
1.34566	<0.001	GO:0009066	aspartate family amino acid metabolic process
1.343	0.042	GO:0016769	transferase activity, transferring nitrogenous groups
1.343	0.042	GO:0045940	positive regulation of steroid metabolic process
1.343	0.042	GO:0090181	regulation of cholesterol metabolic process
1.34078	<0.001	GO:0019395	fatty acid oxidation
1.33724	<0.001	GO:0030195	negative regulation of blood coagulation
1.33724	<0.001	GO:1900047	negative regulation of hemostasis
1.3324	<0.001	GO:0034440	lipid oxidation
1.32688	<0.001	GO:0008652	cellular amino acid biosynthetic process
1.32513	<0.001	GO:0032371	regulation of sterol transport
1.32513	<0.001	GO:0032374	regulation of cholesterol transport
1.31884	0.05	GO:0016645	oxidoreductase activity, acting on the CH-NH group of donors
1.31884	0.05	GO:0034367	macromolecular complex remodeling
1.31884	0.05	GO:0034368	protein-lipid complex remodeling
1.31884	0.05	GO:0034369	plasma lipoprotein particle remodeling
1.31749	<0.001	GO:0044282	small molecule catabolic process
1.31742	<0.001	GO:2000257	regulation of protein activation cascade
1.31272	<0.001	GO:0050819	negative regulation of coagulation
1.30799	0.006	GO:0045922	negative regulation of fatty acid metabolic process
1.30579	<0.001	GO:0044438	microbody part
1.30579	<0.001	GO:0044439	peroxisomal part
1.30069	<0.001	GO:0042558	pteridine-containing compound metabolic process
1.28526	<0.001	GO:0072376	protein activation cascade
1.27724	<0.001	GO:1901607	alpha-amino acid biosynthetic process
1.27518	<0.001	GO:0005777	peroxisome
1.2725	<0.001	GO:0006805	xenobiotic metabolic process
1.27128	<0.001	GO:0072562	blood microparticle
1.27096	0.013	GO:0055090	acylglycerol homeostasis
1.27096	0.013	GO:0070328	triglyceride homeostasis
1.26905	<0.001	GO:0016903	oxidoreductase activity, acting on the aldehyde or oxo group of donors
1.25521	<0.001	GO:0042579	microbody
1.23954	0.002	GO:0046686	response to cadmium ion
1.23683	0.015	GO:0071827	plasma lipoprotein particle organization
1.23614	<0.001	GO:0004497	monooxygenase activity
1.23314	<0.001	GO:0019319	hexose biosynthetic process
1.22923	<0.001	GO:0005319	lipid transporter activity
1.22072	0.02	GO:0042304	regulation of fatty acid biosynthetic process
1.21678	<0.001	GO:0046364	monosaccharide biosynthetic process
1.21191	0.003	GO:0006953	acute-phase response
1.20732	<0.001	GO:0061045	negative regulation of wound healing
1.20572	<0.001	GO:0006094	gluconeogenesis
1.20518	0.02	GO:0006730	one-carbon metabolic process
1.19427	<0.001	GO:0042398	cellular modified amino acid biosynthetic process
1.19115	<0.001	GO:0015914	phospholipid transport
1.19018	0.022	GO:0071825	protein-lipid complex subunit organization
1.18898	<0.001	GO:0051289	protein homotetramerization
1.18593	0.006	GO:0042157	lipoprotein metabolic process
1.18256	<0.001	GO:1901605	alpha-amino acid metabolic process
1.18136	<0.001	GO:0019752	carboxylic acid metabolic process
1.18009	<0.001	GO:0006081	cellular aldehyde metabolic process
1.17101	<0.001	GO:0020037	heme binding
1.16164	0.043	GO:0016877	ligase activity, forming carbon-sulfur bonds
1.16068	<0.001	GO:0046906	tetrapyrrole binding
1.15124	<0.001	GO:0006956	complement activation
1.1508	<0.001	GO:0015748	organophosphate ester transport
1.14112	<0.001	GO:0005778	peroxisomal membrane
1.14112	<0.001	GO:0031903	microbody membrane
1.13819	0.013	GO:0010043	response to zinc ion
1.13163	<0.001	GO:0008202	steroid metabolic process
1.12492	<0.001	GO:0006721	terpenoid metabolic process
1.11975	<0.001	GO:0019218	regulation of steroid metabolic process
1.11975	<0.001	GO:0006082	organic acid metabolic process
1.11764	<0.001	GO:0009064	glutamine family amino acid metabolic process
1.11614	0.015	GO:0016830	carbon-carbon lyase activity
1.11427	<0.001	GO:0006720	isoprenoid metabolic process
1.11336	<0.001	GO:0043436	oxoacid metabolic process
1.11208	0.002	GO:0046365	monosaccharide catabolic process
1.11197	<0.001	GO:0032787	monocarboxylic acid metabolic process
1.11144	<0.001	GO:0030193	regulation of blood coagulation
1.11144	<0.001	GO:1900046	regulation of hemostasis
1.11015	<0.001	GO:0016053	organic acid biosynthetic process
1.11015	<0.001	GO:0046394	carboxylic acid biosynthetic process
1.10926	<0.001	GO:1901616	organic hydroxy compound catabolic process
1.10206	<0.001	GO:0006520	cellular amino acid metabolic process
1.09652	<0.001	GO:0044281	small molecule metabolic process
1.09516	0.018	GO:0016627	oxidoreductase activity, acting on the CH-CH group of donors
1.09298	<0.001	GO:0042632	cholesterol homeostasis
1.09298	<0.001	GO:0055092	sterol homeostasis
1.08704	<0.001	GO:0050818	regulation of coagulation
1.08544	<0.001	GO:0006694	steroid biosynthetic process
1.08252	<0.001	GO:1990267	response to transition metal nanoparticle
1.08163	<0.001	GO:0048037	cofactor binding
1.08075	<0.001	GO:0016616	oxidoreductase activity, acting on the CH-OH group of donors, NAD or NADP as acceptor
1.07383	<0.001	GO:0044283	small molecule biosynthetic process
1.07316	<0.001	GO:0044242	cellular lipid catabolic process
1.07184	<0.001	GO:0044724	single-organism carbohydrate catabolic process
1.06959	<0.001	GO:0016101	diterpenoid metabolic process
1.0676	0.006	GO:0002526	acute inflammatory response
1.06405	<0.001	GO:0016614	oxidoreductase activity, acting on CH-OH group of donors
1.05834	<0.001	GO:0001676	long-chain fatty acid metabolic process
1.05505	<0.001	GO:0001523	retinoid metabolic process
1.0547	<0.001	GO:1902652	secondary alcohol metabolic process
1.04616	<0.001	GO:0055088	lipid homeostasis
1.04495	<0.001	GO:0019842	vitamin binding
1.04419	<0.001	GO:1901617	organic hydroxy compound biosynthetic process
1.0412	<0.001	GO:0016052	carbohydrate catabolic process
1.03665	<0.001	GO:0001889	liver development
1.03217	<0.001	GO:0015850	organic hydroxy compound transport
1.03145	<0.001	GO:0008203	cholesterol metabolic process
1.02638	0.002	GO:1903317	regulation of protein maturation
1.02525	<0.001	GO:1901565	organonitrogen compound catabolic process
1.02152	<0.001	GO:0006631	fatty acid metabolic process
1.02107	<0.001	GO:0034754	cellular hormone metabolic process
1.02037	<0.001	GO:0016597	amino acid binding
1.01419	<0.001	GO:0016491	oxidoreductase activity
1.0139	<0.001	GO:0016705	oxidoreductase activity, acting on paired donors, with incorporation or reduction of molecular oxygen
1.00986	<0.001	GO:0030258	lipid modification
0.999751	0.004	GO:0006637	acyl-CoA metabolic process
0.999751	0.004	GO:0035383	thioester metabolic process
0.997307	<0.001	GO:0050662	coenzyme binding
0.990292	0.019	GO:0006090	pyruvate metabolic process
0.989848	<0.001	GO:0006575	cellular modified amino acid metabolic process
0.989022	<0.001	GO:1901615	organic hydroxy compound metabolic process
0.986722	<0.001	GO:0015718	monocarboxylic acid transport
0.983104	<0.001	GO:0031406	carboxylic acid binding
0.982108	<0.001	GO:0006869	lipid transport
0.981827	<0.001	GO:0005506	iron ion binding
0.981125	<0.001	GO:0005759	mitochondrial matrix
0.980793	0.006	GO:0045833	negative regulation of lipid metabolic process
0.980331	<0.001	GO:0043177	organic acid binding
0.978341	<0.001	GO:0016042	lipid catabolic process
0.978031	<0.001	GO:0004252	serine-type endopeptidase activity
0.977968	<0.001	GO:0044712	single-organism catabolic process
0.977344	<0.001	GO:0055114	oxidation-reduction process
0.976344	0.02	GO:0070613	regulation of protein processing
0.974651	0.006	GO:0005496	steroid binding
0.973598	<0.001	GO:0043648	dicarboxylic acid metabolic process
0.973513	<0.001	GO:0044710	single-organism metabolic process
0.972836	<0.001	GO:0016125	sterol metabolic process
0.969534	0.022	GO:0031100	organ regeneration
0.962621	0.006	GO:0060205	cytoplasmic membrane-bounded vesicle lumen
0.956728	0.008	GO:0031983	vesicle lumen
0.950717	<0.001	GO:0005996	monosaccharide metabolic process
0.949754	<0.001	GO:0072330	monocarboxylic acid biosynthetic process
0.944731	<0.001	GO:0051186	cofactor metabolic process
0.933917	0.014	GO:0032368	regulation of lipid transport
0.930239	<0.001	GO:0006732	coenzyme metabolic process
0.921088	<0.001	GO:0061041	regulation of wound healing
0.917048	0.006	GO:0033559	unsaturated fatty acid metabolic process
0.914901	<0.001	GO:0015711	organic anion transport
0.907506	0.006	GO:0008514	organic anion transmembrane transporter activity
0.906978	0.02	GO:0051591	response to cAMP
0.904119	<0.001	GO:0015849	organic acid transport
0.891095	<0.001	GO:0004866	endopeptidase inhibitor activity
0.888618	<0.001	GO:0006790	sulfur compound metabolic process
0.88595	<0.001	GO:0051262	protein tetramerization
0.885221	<0.001	GO:0043233	organelle lumen
0.884422	<0.001	GO:0016829	lyase activity
0.883835	<0.001	GO:0046942	carboxylic acid transport
0.883125	0.003	GO:0016051	carbohydrate biosynthetic process
0.878269	<0.001	GO:0061135	endopeptidase regulator activity
0.878261	<0.001	GO:0006006	glucose metabolic process
0.875653	0.013	GO:0045471	response to ethanol
0.871994	<0.001	GO:0030414	peptidase inhibitor activity
0.870789	<0.001	GO:0006066	alcohol metabolic process
0.867577	<0.001	GO:0017171	serine hydrolase activity
0.866893	<0.001	GO:0006629	lipid metabolic process
0.860594	<0.001	GO:0031974	membrane-enclosed lumen
0.854238	0.015	GO:0006641	triglyceride metabolic process
0.851658	<0.001	GO:1901681	sulfur compound binding
0.850706	<0.001	GO:0042445	hormone metabolic process
0.849733	<0.001	GO:0070013	intracellular organelle lumen
0.84425	0.006	GO:0006766	vitamin metabolic process
0.84248	<0.001	GO:0044255	cellular lipid metabolic process
0.833228	0.008	GO:0008236	serine-type peptidase activity
0.822006	0.025	GO:0046890	regulation of lipid biosynthetic process
0.821972	<0.001	GO:0019318	hexose metabolic process
0.820143	<0.001	GO:0044248	cellular catabolic process
0.818138	0.027	GO:0006639	acylglycerol metabolic process
0.816793	<0.001	GO:0010038	response to metal ion
0.814304	0.039	GO:0006638	neutral lipid metabolic process
0.811977	0.015	GO:0044262	cellular carbohydrate metabolic process
0.807139	0.006	GO:1903035	negative regulation of response to wounding
0.806734	0.044	GO:0046683	response to organophosphorus
0.797824	0.006	GO:0007584	response to nutrient
0.79502	0.02	GO:0014074	response to purine-containing compound
0.794232	<0.001	GO:0006820	anion transport
0.788415	0.02	GO:0051384	response to glucocorticoid
0.785309	<0.001	GO:1901575	organic substance catabolic process
0.784645	<0.001	GO:0061134	peptidase regulator activity
0.77701	<0.001	GO:0009056	catabolic process
0.759861	0.043	GO:0031960	response to corticosteroid
0.759808	<0.001	GO:0044699	single-organism process
0.75646	<0.001	GO:0010951	negative regulation of endopeptidase activity
0.750498	<0.001	GO:0031667	response to nutrient levels
0.746761	0.008	GO:0006576	cellular biogenic amine metabolic process
0.746761	0.008	GO:0044106	cellular amine metabolic process
0.739987	<0.001	GO:0010466	negative regulation of peptidase activity
0.736764	0.013	GO:0044272	sulfur compound biosynthetic process
0.736709	<0.001	GO:0009991	response to extracellular stimulus
0.734299	0.013	GO:0010565	regulation of cellular ketone metabolic process
0.733435	<0.001	GO:0004857	enzyme inhibitor activity
0.725851	<0.001	GO:0019216	regulation of lipid metabolic process
0.724577	0.015	GO:0009308	amine metabolic process
0.721723	<0.001	GO:1901361	organic cyclic compound catabolic process
0.707617	<0.001	GO:0008150	biological_process
0.7069	<0.001	GO:1901564	organonitrogen compound metabolic process
0.696889	<0.001	GO:0065010	extracellular membrane-bounded organelle
0.696889	<0.001	GO:0070062	extracellular exosome
0.696105	<0.001	GO:0044711	single-organism biosynthetic process
0.694358	<0.001	GO:0043230	extracellular organelle
0.694358	<0.001	GO:1903561	extracellular vesicle
0.69296	<0.001	GO:0003824	catalytic activity
0.692189	<0.001	GO:0008152	metabolic process
0.68438	0.018	GO:0048732	gland development
0.68203	<0.001	GO:0051346	negative regulation of hydrolase activity
0.674296	0.02	GO:0010817	regulation of hormone levels
0.6666	<0.001	GO:0010035	response to inorganic substance
0.661024	<0.001	GO:0045861	negative regulation of proteolysis
0.649097	0.044	GO:0051260	protein homooligomerization
0.645056	<0.001	GO:0042493	response to drug
0.623496	<0.001	GO:0031988	membrane-bounded vesicle
0.615948	<0.001	GO:0044421	extracellular region part
0.615928	<0.001	GO:0031982	vesicle
0.614721	0.015	GO:0046486	glycerolipid metabolic process
0.61249	0.006	GO:1903034	regulation of response to wounding
0.608255	<0.001	GO:0044429	mitochondrial part
0.599886	0.006	GO:0019439	aromatic compound catabolic process
0.59187	<0.001	GO:0005789	endoplasmic reticulum membrane
0.570934	0.048	GO:0052548	regulation of endopeptidase activity
0.566248	<0.001	GO:0044723	single-organism carbohydrate metabolic process
0.564864	0.002	GO:0008610	lipid biosynthetic process
0.560598	<0.001	GO:0008289	lipid binding
0.535105	<0.001	GO:0005615	extracellular space
0.534855	<0.001	GO:0005739	mitochondrion
0.529737	<0.001	GO:1901566	organonitrogen compound biosynthetic process
0.521809	<0.001	GO:0042803	protein homodimerization activity
0.51829	<0.001	GO:0030162	regulation of proteolysis
0.516399	<0.001	GO:0044432	endoplasmic reticulum part
0.514828	<0.001	GO:0044444	cytoplasmic part
0.508477	<0.001	GO:0005975	carbohydrate metabolic process
0.507474	<0.001	GO:0071704	organic substance metabolic process
0.484332	0.002	GO:0048878	chemical homeostasis
0.482612	0.044	GO:0010243	response to organonitrogen compound
0.471685	0.014	GO:0019637	organophosphate metabolic process
0.468861	0.002	GO:0022892	substrate-specific transporter activity
0.466199	<0.001	GO:0005576	extracellular region
0.454765	<0.001	GO:0043168	anion binding
0.451157	<0.001	GO:0044237	cellular metabolic process
0.447328	<0.001	GO:0042802	identical protein binding
0.438162	0.002	GO:0005215	transporter activity
0.437863	<0.001	GO:0006811	ion transport
0.42047	<0.001	GO:0044763	single-organism cellular process
0.41438	<0.001	GO:0044238	primary metabolic process
0.394323	0.019	GO:0042592	homeostatic process
0.381833	<0.001	GO:0042221	response to chemical
0.376309	<0.001	GO:0043167	ion binding
0.370796	<0.001	GO:0043227	membrane-bounded organelle
0.339828	<0.001	GO:0065008	regulation of biological quality
0.334151	<0.001	GO:0036094	small molecule binding
0.333056	<0.001	GO:0009987	cellular process
0.310215	<0.001	GO:0043226	organelle
0.283115	0.048	GO:0031090	organelle membrane
0.279104	0.025	GO:0005829	cytosol
LOD	Adjusted P	Attribute ID	Under represented GO terms
-1.43421	0.006	GO:0051726	regulation of cell cycle
-1.36636	0.043	GO:0004930	G-protein coupled receptor activity
-1.18988	<0.001	GO:0097659	nucleic acid-templated transcription
-1.18967	<0.001	GO:0006351	transcription, DNA-templated
-1.06297	0.003	GO:0004888	transmembrane signaling receptor activity
-1.0054	<0.001	GO:0003677	DNA binding
-0.899881	<0.001	GO:0032774	RNA biosynthetic process
-0.892441	<0.001	GO:0090304	nucleic acid metabolic process
-0.87046	<0.001	GO:0034645	cellular macromolecule biosynthetic process
-0.868398	<0.001	GO:0016070	RNA metabolic process
-0.866669	<0.001	GO:0003676	nucleic acid binding
-0.729341	<0.001	GO:0006355	regulation of transcription, DNA-templated
-0.696261	0.001	GO:1902589	single-organism organelle organization
-0.687766	<0.001	GO:1903506	regulation of nucleic acid-templated transcription
-0.666197	<0.001	GO:0051252	regulation of RNA metabolic process
-0.662172	<0.001	GO:0009059	macromolecule biosynthetic process
-0.659068	<0.001	GO:0034654	nucleobase-containing compound biosynthetic process
-0.658805	<0.001	GO:2000112	regulation of cellular macromolecule biosynthetic process
-0.650291	<0.001	GO:2001141	regulation of RNA biosynthetic process
-0.645606	0.015	GO:0006357	regulation of transcription from RNA polymerase II promoter
-0.640993	<0.001	GO:0019219	regulation of nucleobase-containing compound metabolic process
-0.626948	0.039	GO:0003723	RNA binding
-0.622178	0.046	GO:0004871	signal transducer activity
-0.604211	0.02	GO:0035556	intracellular signal transduction
-0.586449	<0.001	GO:0043412	macromolecule modification
-0.577613	<0.001	GO:0010556	regulation of macromolecule biosynthetic process
-0.571316	<0.001	GO:0044260	cellular macromolecule metabolic process
-0.561374	<0.001	GO:0051171	regulation of nitrogen compound metabolic process
-0.557994	<0.001	GO:0006464	cellular protein modification process
-0.557994	<0.001	GO:0036211	protein modification process
-0.550138	<0.001	GO:0043228	non-membrane-bounded organelle
-0.550138	<0.001	GO:0043232	intracellular non-membrane-bounded organelle
-0.518698	0.003	GO:0006996	organelle organization
-0.517197	<0.001	GO:0044267	cellular protein metabolic process
-0.487087	<0.001	GO:0044428	nuclear part
-0.482138	<0.001	GO:0005634	nucleus
-0.475262	0.006	GO:0005654	nucleoplasm
-0.462914	0.002	GO:0018130	heterocycle biosynthetic process
-0.436457	0.006	GO:0019438	aromatic compound biosynthetic process
-0.427371	<0.001	GO:0031326	regulation of cellular biosynthetic process
-0.415354	<0.001	GO:0007165	signal transduction
-0.40351	<0.001	GO:0006139	nucleobase-containing compound metabolic process
-0.381234	0.006	GO:0010468	regulation of gene expression
-0.374545	0.006	GO:0043234	protein complex
-0.354937	0.02	GO:0009889	regulation of biosynthetic process
-0.320784	<0.001	GO:0043170	macromolecule metabolic process
-0.309629	<0.001	GO:0050794	regulation of cellular process
